# Supplementary material
Source: PubMed Central journal article supplement (PMC3168669)
Supplement: supp_090289_Microsoft_Word_-_eval-pottie-1-at.pdf [file supp_090289_Microsoft_Word_-_eval-pottie-1-at.pdf]

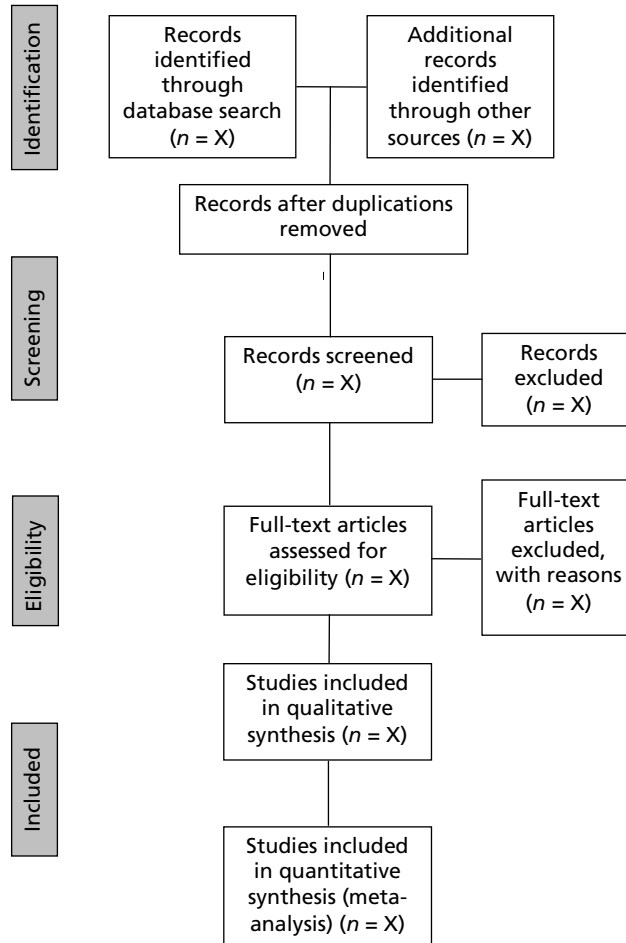

Figure 1: Template of search and selection flow chart using the Preferred Reporting Items for Systematic Reviews and Meta-analyses (PRISMA)<sup>8</sup> framework.

## Reference

1. Moher D, Liberati A, Tetzlaff J, et al. Preferred reporting items for systematic reviews and meta-analyses: the PRISMA statement. *PLoS Med* 2009;6:e1000097.
