# Supplementary material
Source: PubMed Central journal article supplement (PMC3168669)
Supplement: supp_090289_Microsoft_Word_-_eval-pottie-2-at.pdf [file supp_090289_Microsoft_Word_-_eval-pottie-2-at.pdf]

**Appendix 2:** Table to summarize characteristics of systematic reviews. Characteristics of systematic reviews or guidelines related to screening for cervical cancer or vaccination against HPV virus (sample)

| Author and year                  | Objective                                                                                                                                                                                  | No. and type of studies included        | Participants                                                                                                                                                                                                         | Intervention                                                                    | Findings                                                                                                                                                                                                                                                                                                                                                                                                                                                                                                                                                                                      |
|----------------------------------|--------------------------------------------------------------------------------------------------------------------------------------------------------------------------------------------|-----------------------------------------|----------------------------------------------------------------------------------------------------------------------------------------------------------------------------------------------------------------------|---------------------------------------------------------------------------------|-----------------------------------------------------------------------------------------------------------------------------------------------------------------------------------------------------------------------------------------------------------------------------------------------------------------------------------------------------------------------------------------------------------------------------------------------------------------------------------------------------------------------------------------------------------------------------------------------|
| Saslow et al. 2002 <sup>1</sup>  | To update the American Cancer Society guideline regarding screening for the early detection of cervical neoplasia and cancer                                                               | Not specified                           | <ul style="list-style-type: none"> <li>Girls, aged 10–19 years.</li> <li>Women 19 and older, including those who are immunosuppressed, HIV-positive or who have undergone total and subtotal hysterectomy</li> </ul> | Cervical cytologic screening                                                    | <ul style="list-style-type: none"> <li>50%-80% LSILs in adult women regress (21 yr and older), 90% of LSIL in young women (13–21) will regress.</li> <li>Low efficiency of cytologic screening in women over 50</li> <li>Very low prevalence of abnormal cytologic smear results in women who had a hysterectomy for benign disease, and low incidence of abnormal cytologic smear results at 2 yr after hysterectomy for CIN (0.7/1000).</li> <li>Compared with annual screening, relative risks with a 2-year or 3-year screening interval range from 1–2 and 2–3, respectively.</li> </ul> |
| Rambout et al. 2007 <sup>2</sup> | To determine whether women who receive prophylactic HPV vaccination have a lower incidence of persistent HPV infection and precancerous cervical lesions than women who are not vaccinated | 6 studies, randomized controlled trials | <ul style="list-style-type: none"> <li>40 323 women were enrolled in the six studies. Ages ranged from 15 to 25 years</li> </ul>                                                                                     | Prophylactic HPV vaccination against at least one oncogenic strain of the virus | <ul style="list-style-type: none"> <li>Prophylactic HPV vaccination associated with reduction in the frequency of high-grade cervical lesions caused by vaccine-type HPV strains compared with control groups</li> </ul>                                                                                                                                                                                                                                                                                                                                                                      |

Note: CIN = cervical intraepithelial neoplasia, HPV = human papillomavirus, LSIL = low-grade squamous intraepithelial lesion.

## References

1. Saslow D, Castle PE, Cox JT, et al. American Cancer Society Guideline for human papillomavirus (HPV) vaccine use to prevent cervical cancer and its precursors. *CA Cancer J Clin* 2007;57:7-28.
2. Rambout L, Hopkins L, Hutton B, et al. Prophylactic vaccination against human papillomavirus infection and disease in women: a systematic review of randomized controlled trials. *CMAJ* 2007;177:469-79.
